# Supplementary material for: Anti-Inflammatory and Anti-Acne Effects of Hamamelis virginiana Bark in Human Keratinocytes
Source: MDPI journal article supplement (doi:10.3390/antiox11061119), 2022-06-05
Supplement: s1 [file s1]

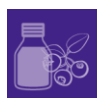

## Supplementary material

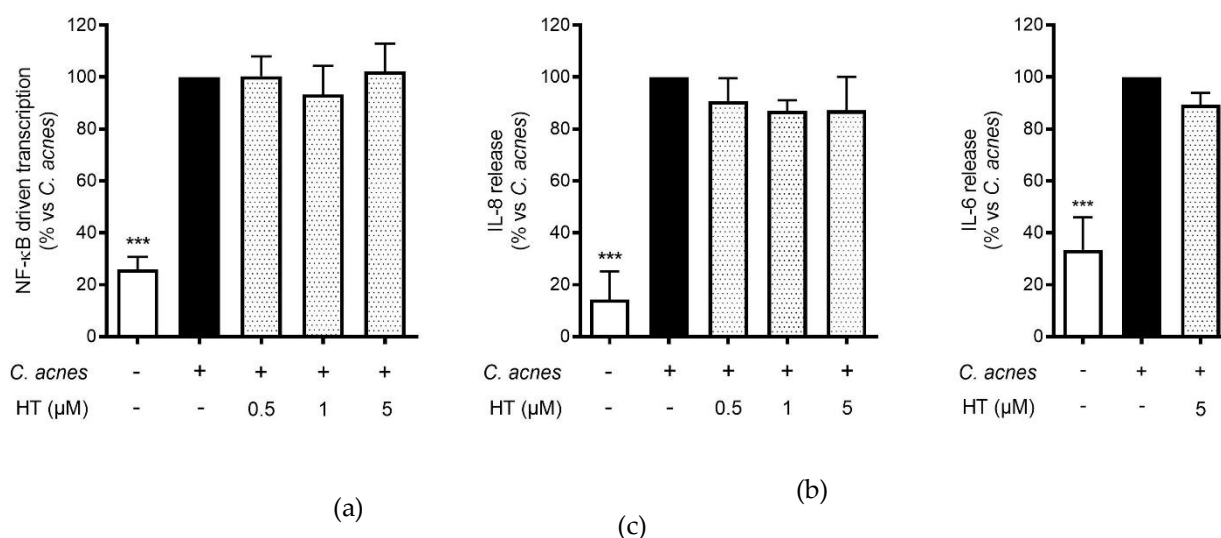

**Figure S1.** Effect of HT treatment on the NF-κB-driven transcription (0.5–5 μM) (a) for 6 h, IL-8 release (0.5–5 μM) (b), and IL-6 release (5 μM) (c) in HaCaT cells infected with *C. acnes* (O.D.=0.1) for 24 h. Apigenin (20 μM), representing the reference inhibitor, abrogated the NF-κB-driven transcription (-100%) and inhibited the release of IL-8 (-42%) and IL-6 (-97%). The amount of IL-8 in the stimulated condition was  $426.41 \pm 96.97$  pg/mL. \*\*\*  $p < 0.001$  vs. stimulus.

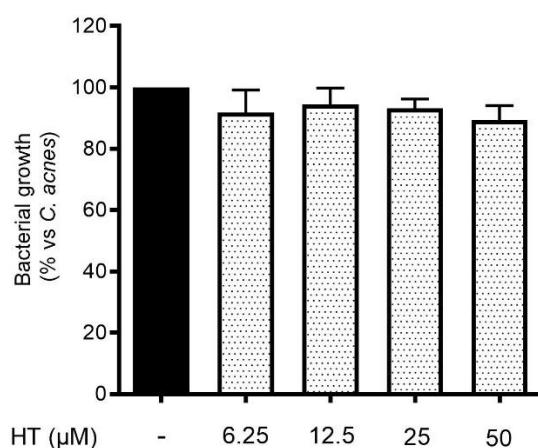

**Figure S2.** Effect of HT treatment (6.25–50 μM) on the growth of *C. acnes* (O.D.=0.1) for 24 h. Erythromycin (0.2 μg/mL) was used as antibiotic control (-80% of growth vs. control).

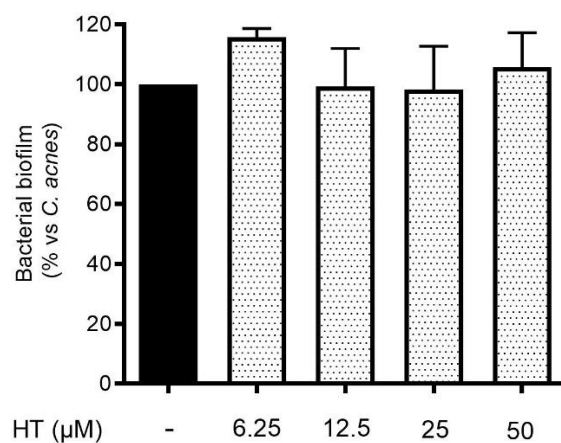

**Figure S3.** Effect of HT treatment (6.25–50  $\mu\text{M}$ ) on the biofilm formation of *C. acnes* (O.D.=0.1) for 24 h. Erythromycin (0.2  $\mu\text{g/mL}$ ) was used as antibiotic control (-90% of growth vs. control).

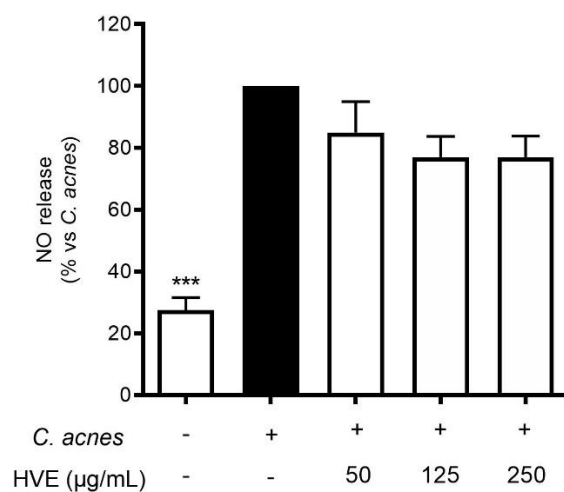

**Figure S4.** Effect of HVE treatment (50–250  $\mu\text{g/mL}$ ) on the NO release (b) in HaCaT cells infected with *C. acnes* (O.D.=0.1) for 24 h. EGCG (40  $\mu\text{M}$ ), representing the reference inhibitor, inhibited the release of NO (-57%). \*\*\*  $p < 0.001$  vs. stimulus.

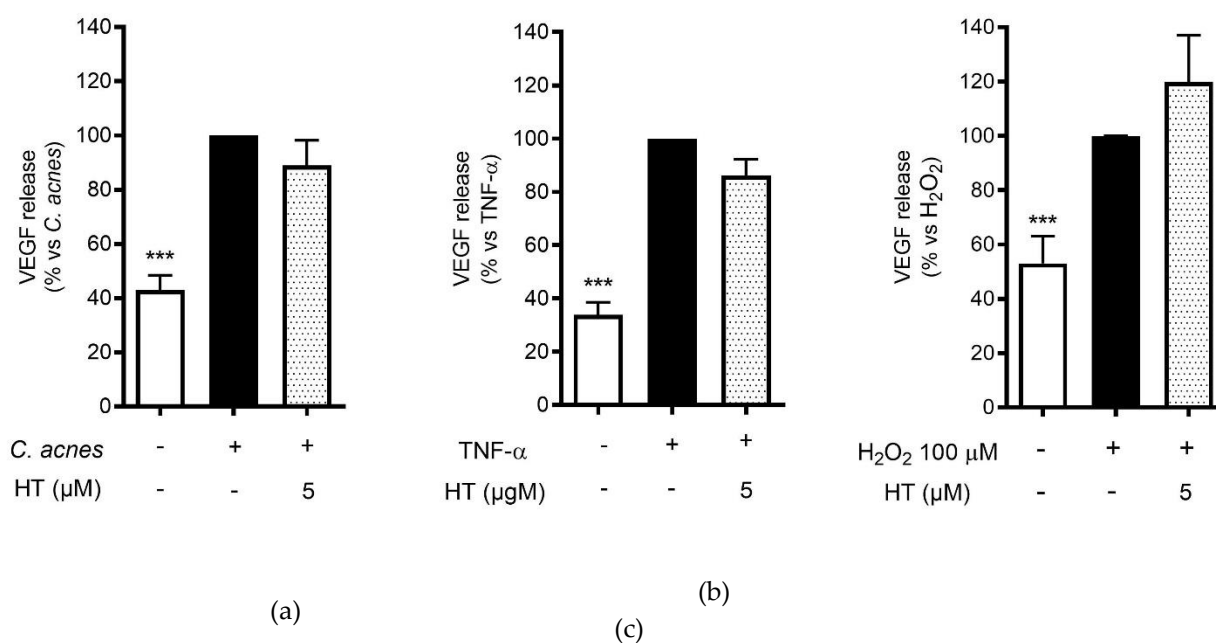

**Figure S5.** Effect of HT treatment (5 μM) on VEGF release induced by *C. acnes* (a), TNF-α (10 ng/mL) (b), or H<sub>2</sub>O<sub>2</sub> (100 μM) in HaCaT cells after 24 h. Apigenin (20 μM), representing the reference inhibitor, inhibited VEGF release induced by H<sub>2</sub>O<sub>2</sub> (-57%), TNF-α (-43%) and *C. acnes* (-33%). The amount of VEGF in the presence of TNF-α or *C. acnes* were 407,48 ± 3.98 pg/mL, and 47,29 ± 2,27 pg/mL in the presence of H<sub>2</sub>O<sub>2</sub>. \*\*\* p < 0.001 vs. stimulus.
